# Supplementary material
Source: publisher figshare collection journal article supplement (https://frontiersin.figshare.com/ndownloader/files/35393336)
Supplement: Supplementary file 1 [file 35393336]

| **Test ID** | **Test type** | **Bank** | **Test duration** | **Current conditions** | **Current speed** | **Speed over Water** | **Wind speed** | **Wind direction** | **Water depth** | **Water level** | **Rhine river discharge** |
| --- | --- | --- | --- | --- | --- | --- | --- | --- | --- | --- | --- |
| [mmddyy-nb ] | [Static/Dynamic] | [Inner/Outer Left/Right] | [hh:mm] | [ebb/flood] | [kts] | [kts] | [m/s] | [-] | [m] | [m] + NAP | m3/s |
| 013018-01 | Dynamic | Outer | 01:15 | Flood | 0.83 | 1.63 | 2.77 | W | 7.00 | 1.34 | 6061 |
| 032218-01 | Dynamic | Outer | 01:31 | Ebb | 1.02 | 2.28 | 3.86 | NW | 8.00 | -0.22 | 2352 |
| 032718-01 | Dynamic | Outer | 02:05 | Flood | 0.04 | 2.17 | 3.63 | SSE | 9.47 | 0.65 | 2079 |
| 032718-02 | Dynamic | Outer | 01:57 | Ebb | 1.15 | 1.99 | 2.63 | SSE | 7.46 | -0.48 | 2079 |
| 032918-01 | Dynamic | Outer | 01:59 | Flood | 0.45 | 2.25 | 2.49 | SSW | 9.56 | 0.90 | 2002 |
| 041018-01 | Dynamic | Inner | 01:54 | Flood | 0.28 | 1.81 | 3.56 | ESE | 8.33 | 0.86 | 2304 |
| 041018-02 | Dynamic | Outer | 02:00 | Flood | 0.86 | 1.75 | 2.25 | E | 8.76 | 0.08 | 2304 |
| 042418-01 | Dynamic | Outer | 01:30 | Flood | 0.93 | 1.85 | 5.83 | WSW | 9.05 | 1.14 | 1917 |
| 042418-02 | Dynamic | Inner | 01:31 | Flood | 0.43 | 1.91 | 5.02 | WSW | 8.36 | 0.34 | 1917 |
| 050218-01 | Dynamic | Outer | 02:02 | Ebb | 1.23 | 1.74 | 6.75 | S | 7.69 | -0.44 | 2010 |
| 050818-01 | Static | Outer | 01:32 | Flood | 0.16 | 0.43 | 0.90 | E | 8.50 | 0.52 | 1778 |
| 051518-01 | Static | Outer | 02:21 | Ebb | 0.62 | 1.01 | 2.31 | ENE | 7.27 | -0.18 | 1925 |
| 051518-02 | Static | Outer | 02:06 | Flood | 1.02 | 1.01 | 3.18 | NNE | 9.06 | 1.12 | 1925 |
| 051718-01 | Static | Inner | 01:23 | Ebb | 1.38 | 1.32 | 3.79 | N | 7.67 | -0.49 | 2030 |
| 051718-02 | Static | Outer | 02:20 | Ebb | 0.71 | 0.79 | 4.92 | N | 7.18 | -0.16 | 2030 |
| 052918-01 | Dynamic | Inner | 01:34 | Ebb | 0.88 | 0.68 | 2.87 | NNE | 8.04 | -0.34 | 1871 |
| 052918-02 | Static | Outer | 01:24 | Ebb | 0.34 | 0.60 | 1.58 | ENE | 6.40 | -0.01 | 1871 |
| 061818-01 | Dynamic | Inner | 00:59 | Ebb | 0.92 | 1.40 | 5.90 | WSW | 6.68 | -0.19 | 2409 |
| 061818-02 | Static | Outer | 01:50 | Ebb | 0.24 | 0.64 | 5.94 | WSW | 8.12 | 0.19 | 2409 |
| 062018-01 | Dynamic | Inner | 00:15 | Flood | 0.27 | 2.08 | 3.91 | SW | 7.63 | 0.76 | 2098 |
| 062018-02 | Dynamic | Inner | 00:34 | Ebb | 1.05 | 1.86 | 3.39 | SW | 9.33 | -0.38 | 2098 |
| 070418-02 | Static | Inner | 01:05 | Ebb | 0.98 | 1.29 | 1.88 | ENE | 6.70 | -0.28 | 1264 |
| 070518-01 | Static | Inner | 02:00 | Flood | 0.27 | 1.44 | 2.29 | NNW | 6.90 | 0.59 | 1235 |
| 070518-02 | Static | Inner | 01:45 | Ebb | 0.83 | 1.12 | 3.25 | NW | 6.00 | -0.22 | 1235 |
| 070918-01 | Static | Inner | 01:03 | Flood | 0.40 | 1.71 | 3.27 | SW | 7.90 | 0.74 | 1343 |
| 070918-02 | Static | Inner | 01:20 | Ebb | 0.84 | 0.97 | 3.78 | NNW | 6.80 | -0.31 | 1343 |
| 071018-01 | Static | Inner | 00:58 | Flood | 1.32 | 1.36 | 5.38 | NNW | 6.50 | 1.33 | 1380 |
| 071018-02 | Static | Outer | 01:24 | Flood | 0.39 | 1.21 | 5.09 | NNW | 10.50 | 0.42 | 1380 |

Supplementary Table 1. Test conditions during the sampling surveys

| **Test ID** | **Test type** | **Bank** | **Current conditions** | **Plastic**  **Weight** | | | **Plastic**  **Number** | | | **Other non-organic**  **Weight** | | | **Other non-organic**  **Number** | | | **Organic**  **Weight** | | |
| --- | --- | --- | --- | --- | --- | --- | --- | --- | --- | --- | --- | --- | --- | --- | --- | --- | --- | --- |
| **Surface** | **Middle** | **Deep** | **Surface** | **Middle** | **Deep** | **Surface** | **Middle** | **Deep** | **Surface** | **Middle** | **Deep** | **Surface** | **Middle** | **Deep** |
| [mmddyy-nb] | [Static/Dynamic] | [Inner/Outer] | [ebb/flood] | [g/m3] | [g/m3] | [g/m3] | [nb/m3] | [nb/m3] | [nb/m3] | [g/m3] | [g/m3] | [g/m3] | [nb/m3] | [nb/m3] | [nb/m3] | [g/m3] | [g/m3] | [g/m3] |
| 013018-01 | Dynamic | Outer | Flood | 2.36E-03 | 8.08E-05 | 9.08E-05 | 1.32E-01 | 1.04E-02 | 1.58E-02 | 0.00E+00 | 0.00E+00 | 0.00E+00 | 0.00E+00 | 0.00E+00 | 0.00E+00 | 4.00E-01 | 1.15E-03 | 1.54E-03 |
| 032218-01 | Dynamic | Outer | Ebb | 2.91E-05 | 7.98E-05 | 1.16E-04 | 1.82E-03 | 4.89E-03 | 8.44E-03 | 2.83E-02 | 0.00E+00 | 0.00E+00 | 4.55E-04 | 0.00E+00 | 0.00E+00 | 1.36E-01 | 1.10E-03 | 2.52E-03 |
| 032718-01 | Dynamic | Outer | Flood | 1.00E-04 | 3.97E-05 | 4.68E-05 | 5.17E-03 | 5.76E-03 | 5.08E-03 | 0.00E+00 | 0.00E+00 | 0.00E+00 | 0.00E+00 | 0.00E+00 | 0.00E+00 | 1.34E-02 | 5.08E-04 | 9.32E-04 |
| 032718-02 | Dynamic | Outer | Ebb | 1.15E-03 | 9.38E-05 | 1.56E-04 | 3.67E-03 | 8.40E-03 | 1.18E-02 | 0.00E+00 | 0.00E+00 | 0.00E+00 | 0.00E+00 | 0.00E+00 | 0.00E+00 | 8.67E-03 | 1.00E-03 | 2.60E-03 |
| 032918-01 | Dynamic | Outer | Flood | 4.58E-04 | 1.05E-04 | 4.60E-05 | 6.21E-03 | 9.31E-03 | 8.79E-03 | 0.00E+00 | 0.00E+00 | 0.00E+00 | 0.00E+00 | 0.00E+00 | 0.00E+00 | 1.38E-03 | 1.03E-03 | 8.62E-04 |
| 041018-01 | Dynamic | Inner | Flood | 5.48E-06 | 3.67E-05 | 1.94E-04 | 6.45E-04 | 4.22E-03 | 9.56E-03 | 0.00E+00 | 1.33E-06 | 0.00E+00 | 0.00E+00 | 2.22E-04 | 0.00E+00 | 4.19E-03 | 2.22E-03 | 7.33E-03 |
| 041018-02 | Dynamic | Outer | Flood | 3.41E-05 | 3.78E-05 | 8.86E-03 | 4.06E-03 | 1.78E-03 | 1.11E-02 | 0.00E+00 | 0.00E+00 | 2.22E-03 | 0.00E+00 | 0.00E+00 | 2.22E-04 | 3.13E-04 | 2.22E-04 | 2.78E-02 |
| 042418-01 | Dynamic | Outer | Flood | 1.89E-05 | 1.67E-05 | 6.42E-05 | 1.67E-03 | 2.22E-03 | 5.83E-03 | 0.00E+00 | 0.00E+00 | 0.00E+00 | 0.00E+00 | 0.00E+00 | 0.00E+00 | 3.89E-03 | 2.78E-04 | 5.56E-04 |
| 042418-02 | Dynamic | Inner | Flood | 5.36E-04 | 7.66E-05 | 5.00E-06 | 7.89E-03 | 1.58E-03 | 1.58E-03 | 0.00E+00 | 0.00E+00 | 0.00E+00 | 0.00E+00 | 0.00E+00 | 0.00E+00 | 1.74E-02 | 2.63E-04 | 2.63E-04 |
| 050218-01 | Dynamic | Outer | Ebb | 4.20E-04 | 9.98E-05 | 3.62E-04 | 5.22E-03 | 6.74E-03 | 1.43E-02 | 0.00E+00 | 0.00E+00 | 0.00E+00 | 0.00E+00 | 0.00E+00 | 0.00E+00 | 1.22E-02 | 6.52E-03 | 6.09E-03 |
| 050818-01 | Static | Outer | Flood | 5.28E-04 | 2.23E-04 | 1.22E-05 | 5.56E-03 | 7.78E-03 | 1.11E-02 | 0.00E+00 | 0.00E+00 | 0.00E+00 | 0.00E+00 | 0.00E+00 | 0.00E+00 | 2.00E-02 | 1.11E-03 | 1.11E-03 |
| 051518-01 | Static | Outer | Ebb | 1.00E-05 | 3.10E-05 | 7.10E-06 | 2.00E-03 | 4.19E-03 | 9.68E-04 | 0.00E+00 | 0.00E+00 | 0.00E+00 | 0.00E+00 | 0.00E+00 | 0.00E+00 | 1.20E-02 | 9.68E-04 | 6.45E-04 |
| 051518-02 | Static | Outer | Flood | 4.01E-04 | 6.85E-05 | 7.59E-05 | 4.29E-03 | 4.07E-03 | 2.59E-03 | 0.00E+00 | 0.00E+00 | 0.00E+00 | 0.00E+00 | 0.00E+00 | 0.00E+00 | 2.86E-02 | 7.41E-04 | 1.11E-03 |
| 051718-01 | Static | Inner | Ebb | 1.82E-04 | 5.91E-04 | 4.00E-04 | 1.56E-02 | 2.13E-02 | 1.29E-02 | 0.00E+00 | 6.92E-05 | 0.00E+00 | 0.00E+00 | 8.33E-04 | 0.00E+00 | 1.89E-02 | 3.00E-01 | 4.83E-01 |
| 051718-02 | Static | Outer | Ebb | 1.70E-05 | 2.21E-05 | 5.42E-06 | 1.00E-03 | 2.08E-03 | 1.25E-03 | 0.00E+00 | 0.00E+00 | 0.00E+00 | 0.00E+00 | 0.00E+00 | 0.00E+00 | 3.00E-03 | 8.33E-04 | 8.33E-04 |
| 052918-01 | Dynamic | Inner | Ebb | 1.67E-03 | 5.26E-04 | 7.49E-04 | 2.33E-02 | 4.86E-02 | 2.64E-02 | 0.00E+00 | 2.79E-05 | 4.15E-04 | 0.00E+00 | 7.14E-04 | 7.14E-04 | 1.03E-01 | 1.49E-01 | 4.14E-01 |
| 052918-02 | Static | Outer | Ebb | 5.29E-03 | 1.17E-04 | 2.91E-05 | 5.00E-02 | 6.36E-03 | 6.36E-03 | 0.00E+00 | 0.00E+00 | 0.00E+00 | 0.00E+00 | 0.00E+00 | 0.00E+00 | 6.50E-02 | 9.09E-04 | 9.09E-04 |
| 061818-01 | Dynamic | Inner | Ebb | 6.00E-05 | 2.57E-03 | 3.85E-02 | 3.33E-03 | 2.50E-02 | 3.78E-01 | 1.89E-05 | 9.50E-05 | 4.99E-03 | 1.11E-03 | 1.11E-02 | 7.06E-02 | 1.50E+01 | 8.94E-01 | 1.88E+01 |
| 061818-02 | Static | Outer | Ebb | 1.75E-05 | 7.73E-05 | 5.47E-05 | 3.75E-03 | 9.33E-03 | 8.67E-03 | 0.00E+00 | 2.67E-06 | 0.00E+00 | 0.00E+00 | 2.00E-03 | 0.00E+00 | 2.81E-02 | 1.37E-03 | 3.67E-04 |
| 062018-01 | Dynamic | Inner | Flood | 1.20E-04 | 3.57E-05 | 1.63E-03 | 6.67E-03 | 4.29E-03 | 1.00E-02 | 0.00E+00 | 0.00E+00 | 6.43E-02 | 0.00E+00 | 0.00E+00 | 4.29E-03 | 5.88E-03 | 1.91E-03 | 2.90E-01 |
| 062018-02 | Dynamic | Inner | Ebb | 5.33E-04 | 4.14E-05 | 1.35E-03 | 7.14E-03 | 4.29E-03 | 3.93E-02 | 0.00E+00 | 1.59E-04 | 2.06E-03 | 0.00E+00 | 7.86E-03 | 1.93E-02 | 4.65E-02 | 8.24E-02 | 1.45E+00 |
| 070418-02 | Static | Inner | Ebb | 3.33E-06 | 3.91E-04 | 2.47E-03 | 1.11E-03 | 2.11E-02 | 6.44E-02 | 4.33E-05 | 4.79E-04 | 1.11E-03 | 2.22E-03 | 6.11E-03 | 1.67E-02 | 5.02E-03 | 7.50E-02 | 3.01E-01 |
| 070518-01 | Static | Inner | Flood | 7.04E-04 | 3.32E-05 | 2.36E-04 | 1.05E-03 | 2.43E-03 | 9.73E-03 | 0.00E+00 | 3.41E-05 | 5.68E-06 | 0.00E+00 | 1.08E-03 | 8.11E-04 | 5.26E-03 | 8.11E-03 | 4.70E-02 |
| 070518-02 | Static | Inner | Ebb | 1.62E-05 | 4.25E-04 | 6.99E-04 | 6.15E-03 | 2.04E-02 | 2.68E-02 | 8.46E-06 | 6.25E-04 | 9.02E-04 | 3.85E-03 | 4.40E-03 | 5.60E-03 | 1.97E-01 | 7.60E-02 | 2.66E-01 |
| 070918-01 | Static | Inner | Flood | 5.04E-05 | 0.00E+00 | 6.83E-04 | 1.67E-03 | 0.00E+00 | 1.70E-02 | 0.00E+00 | 0.00E+00 | 9.22E-05 | 0.00E+00 | 0.00E+00 | 3.48E-03 | 5.69E-04 | 0.00E+00 | 1.22E-02 |
| 070918-02 | Static | Inner | Ebb | 5.25E-05 | 1.42E-03 | 2.55E-03 | 1.13E-02 | 4.41E-02 | 5.47E-02 | 0.00E+00 | 1.19E-03 | 5.19E-03 | 0.00E+00 | 4.00E-02 | 9.29E-02 | 1.79E-01 | 1.78E-02 | 1.68E+00 |
| 071018-01 | Static | Inner | Flood | 1.22E-05 | 8.00E-05 | 1.65E-02 | 1.11E-03 | 7.65E-03 | 2.55E-01 | 0.00E+00 | 2.76E-05 | 1.67E-02 | 0.00E+00 | 1.76E-03 | 1.78E-01 | 0.00E+00 | 0.00E+00 | 6.24E+00 |
| 071018-02 | Static | Outer | Flood | 6.55E-04 | 2.36E-05 | 1.05E-05 | 8.18E-03 | 1.36E-03 | 4.55E-04 | 3.15E-01 | 8.18E-06 | 0.00E+00 | 1.82E-03 | 4.55E-04 | 0.00E+00 | 1.91E-02 | 2.36E-04 | 4.01E-04 |

Supplementary Table 2. Concentration of litter per net collected during the surveys
